# Supplementary material
Source: PubMed Central journal article supplement (PMC3890845)
Supplement: 1316537111_pnas.201316537SI.pdf [file 1316537111_pnas.201316537SI.pdf]

# Supporting Information

Yanef et al. 10.1073/pnas.1316537111

## SI Text

### $P_f$ vs. $[H^+]$ Equation.

$$P_f = \frac{(P_f \text{MAX} - P_f \text{min}) [H^+]_{\text{int}}^h}{(K_1^h + [H^+]_{\text{int}}^h)} + P_f \text{min},$$

where

|                      |                                                                           |
|----------------------|---------------------------------------------------------------------------|
| $P_f$                | mean PM water permeability of oocytes                                     |
| $[H^+]_{\text{int}}$ | cytosolic proton concentration                                            |
| $P_f \text{MAX}$     | fitting parameter representing the highest $P_f$ achieved                 |
| $P_f \text{min}$     | fitting parameter representing the lowest $P_f$ achieved                  |
| $K_1$                | cytosolic proton concentration at which half of the maximum effect occurs |
| $h$                  | Hill coefficient                                                          |

### Particular Assumptions of Each Model. Model 1.

vii<sub>1</sub>) tetramers are formed from the random aggregation of FaPIP1;1, FaPIP2;1, or FaPIP2;1N228D homodimers. The proportion of each population of tetramers ( $\phi_i$ ) can be predicted according to the binomial distribution

### Model Equations.

#### FaPIP1;1–FaPIP2;1.

1A.

$$\frac{P_{fCO} - P_{fNI}}{P_{fFaPIP2;1} - P_{fNI}} = \frac{\sum_{i=0}^1 \phi_i \frac{M_{RNA_{FaPIP2;1a}} + M_{RNA_{FaPIP1;1}}}{4} k_c k_{m_i} (p_{fFaPIP1;1}^{2(2-i)} + p_{fFaPIP2;1HET}^{2i}) + 4\phi_2 \frac{M_{RNA_{FaPIP2;1a}} + M_{RNA_{FaPIP1;1}}}{4} k_c k_{m_2} P_{fFaPIP2;1HOM}}{M_{RNA_{FaPIP2;1b}} k_c k_{m_1} P_{fFaPIP2;1HOM}}$$

1B.

$$\frac{P_{fCO} - P_{fNI}}{P_{fFaPIP2;1} - P_{fNI}} = \frac{\sum_{i=0}^2 \phi_i \frac{M_{RNA_{FaPIP2;1a}} + M_{RNA_{FaPIP1;1}}}{4} k_c k_{m_i} (p_{fFaPIP1;1}^{2(2-i)} + p_{fFaPIP2;1}^{2i})}{M_{RNA_{FaPIP2;1b}} k_c k_{m_1} P_{fFaPIP2;1}}$$

2A.

$$\frac{P_{fCO} - P_{fNI}}{P_{fFaPIP2;1} - P_{fNI}} = \frac{\sum_{i=0}^3 \phi_i \frac{M_{RNA_{FaPIP2;1a}} + M_{RNA_{FaPIP1;1}}}{4} k_c k_{m_i} (p_{fFaPIP1;1}^{(4-i)} + p_{fFaPIP2;1HET}^i) + 4\phi_4 \frac{M_{RNA_{FaPIP2;1a}} + M_{RNA_{FaPIP1;1}}}{4} k_c k_{m_4} P_{fFaPIP2;1HOM}}{M_{RNA_{FaPIP2;1b}} k_c k_{m_1} P_{fFaPIP2;1HOM}}$$

2B.

$$\frac{P_{fCO} - P_{fNI}}{P_{fFaPIP2;1} - P_{fNI}} = \frac{\sum_{i=0}^4 \phi_i \frac{M_{RNA_{FaPIP2;1a}} + M_{RNA_{FaPIP1;1}}}{4} k_c k_{m_i} (p_{fFaPIP1;1}^{(4-i)} + p_{fFaPIP2;1}^i)}{M_{RNA_{FaPIP2;1b}} k_c k_{m_1} P_{fFaPIP2;1}}$$

#### FaPIP1;1–FaPIP2;1N228D.

1AB.

$$\frac{P_{fCO} - P_{fNI}}{P_{fFaPIP2;1} - P_{fNI}} = \frac{\sum_{i=0}^2 \phi_i \frac{M_{RNA_{FaPIP2;1N228D}} + M_{RNA_{FaPIP1;1}}}{4} k_c k_{m_i} (p_{fFaPIP1;1}^{2(2-i)} + (p_{fFaPIP2;1N228D}^{2i}))}{M_{RNA_{FaPIP2;1b}} k_c k_{m_1} P_{fFaPIP2;1}}$$

2AB.

$$\frac{P_{fCO} - P_{fNI}}{P_{fFaPIP2;1} - P_{fNI}} = \frac{\sum_{i=0}^4 \phi_i \frac{M_{RNA_{FaPIP2;1N228D}} + M_{RNA_{FaPIP1;1}}}{4} k_c k_{m_i} (p_{fFaPIP1;1}^{(4-i)} + (p_{fFaPIP2;1N228D}^i))}{M_{RNA_{FaPIP2;1b}} k_c k_{m_1} P_{fFaPIP2;1}}$$

$$\phi_i = \frac{2!}{i!(2-i)!} \theta^i (1-\theta)^{2-i},$$

where  $i$  is the number of FaPIP2;1 or FaPIP2;1N228D dimers within the tetramer, and  $\theta$  is the fraction of FaPIP2;1 or FaPIP2;1N228D cRNA of the total cRNA injected.

viii<sub>1A</sub>) It is assumed that FaPIP2;1 has a different intrinsic permeability ( $p_f$ ) if it forms a homotetramer or a heterotetramer.

viii<sub>1B</sub>) It is assumed that all FaPIP2;1 aquaporins have the same  $p_f$  regardless of its tetramerization status.

### Model 2.

vii<sub>2</sub>) Monomeric FaPIP1;1, FaPIP2;1, and FaPIP2;1N228D randomly aggregate as homotetramers and heterotetramers. The proportion of each population of tetramers ( $\phi_i$ ) can be predicted according to the binomial distribution

$$\phi_i = \frac{4!}{i!(4-i)!} \theta^i (1-\theta)^{4-i},$$

where  $i$  is the number of FaPIP2;1 or FaPIP2;1N228D monomers within the tetramer, and  $\theta$  is the fraction of FaPIP2;1 or FaPIP2;1N228D cRNA of the total cRNA injected.

viii<sub>2A</sub>) It is assumed that FaPIP2;1 has a different  $p_f$  depending on whether it forms a homotetramer or a heterotetramer.

viii<sub>2B</sub>) It is assumed that all FaPIP2;1 aquaporins have the same  $p_f$  regardless of the tetramerization status.

where

|                           |                                                                                                                                                            |
|---------------------------|------------------------------------------------------------------------------------------------------------------------------------------------------------|
| $P_{f_{CO}}$              | mean PM water permeability of oocytes co-injected with two different cRNA                                                                                  |
| $P_{f_{NI}}$              | mean PM water permeability of non-injected oocytes                                                                                                         |
| $P_{f_{FaPIP2;1}}$        | mean PM water permeability of oocytes injected only with FaPIP2;1                                                                                          |
| $i$                       | the number of FaPIP2;1 or FaPIP2;1N228D dimers or monomers within the tetramer for models 1 and 2 respectively                                             |
| $\phi_i$                  | proportion of tetramers with $i$ subunits (dimers for models 1 or monomers for models 2) of FaPIP2;1 or FaPIP2;1N228D within the total amount of tetramers |
| $M_{RNA_{FaPIP2;1a}}$     | mass of FaPIP2;1 cRNA co-injected with FaPIP1;1 cRNA                                                                                                       |
| $M_{RNA_{FaPIP1;1}}$      | mass of FaPIP1;1 cRNA co-injected with FaPIP2;1 cRNA                                                                                                       |
| $M_{RNA_{FaPIP2;1N228D}}$ | mass of FaPIP2;1N228D cRNA co-injected with FaPIP1;1 cRNA                                                                                                  |
| $M_{RNA_{FaPIP2;1b}}$     | mass of FaPIP2;1 cRNA injected                                                                                                                             |
| $k_e$                     | translation coefficient                                                                                                                                    |
| $k_{m_i}$                 | localization coefficient for a tetramer with $i$ subunits (dimers for models 1 or monomers for models 2) of FaPIP2;1 or FaPIP2;1N228D                      |
| $p_{f_{FaPIP1;1}}$        | osmotic intrinsic permeability of FaPIP1;1                                                                                                                 |
| $p_{f_{FaPIP2;1}}$        | osmotic intrinsic permeability of FaPIP2;1                                                                                                                 |
| $p_{f_{FaPIP2;1N228D}}$   | osmotic intrinsic permeability of FaPIP2;1N228D                                                                                                            |
| $p_{f_{FaPIP2;1HET}}$     | osmotic intrinsic permeability of FaPIP2;1 forming a heterotetramer                                                                                        |
| $p_{f_{FaPIP2;1HOM}}$     | osmotic intrinsic permeability of FaPIP2;1 forming a homotetramer                                                                                          |

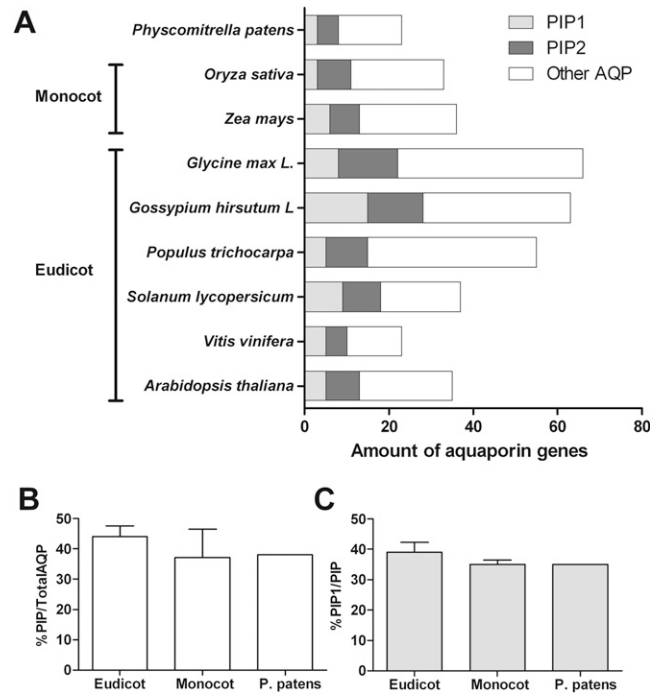

**Fig. S1.** Distribution of genes encoding aquaporins in different plant species. (A) Amount of aquaporin genes present in each species (5–12). (B) Percentage of plasma membrane intrinsic proteins (PIP) within the total amount calculated for each major group of flowering plants and the isolated case of *Physcomitrella patens* (%PIPs/TotalAQP  $\pm$  SEM). (C) Percentage of PIP1 within the total amount of PIP calculated for each major group of flowering plants and *P. patens* (% PIP1/PIPs  $\pm$  SEM).

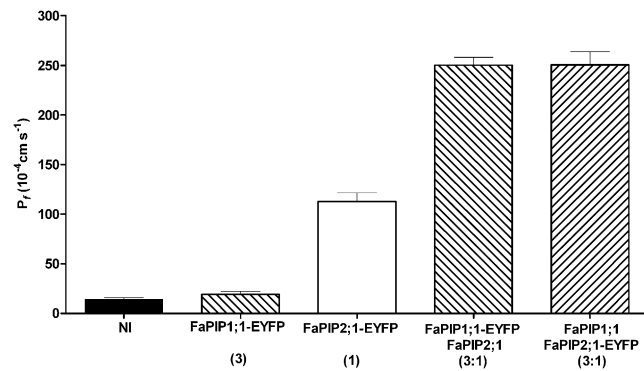

**Fig. S2.** Osmotic water permeability of FaPIP2;1-EYFP and FaPIP1;1-EYFP in *Xenopus* oocytes. Shown is a representative experiment from at least three independent experiments. Amount of aquaporin cRNA is represented in parentheses with an arbitrary unit of measure where 1 is equivalent to 1.25 ng of cRNA. In the case of EYFP-tagged aquaporins, 1 is equivalent to 2.50 ng of cRNA. Data are expressed as mean values (mean  $P_f \pm$  SEM,  $n = 8-12$ ).

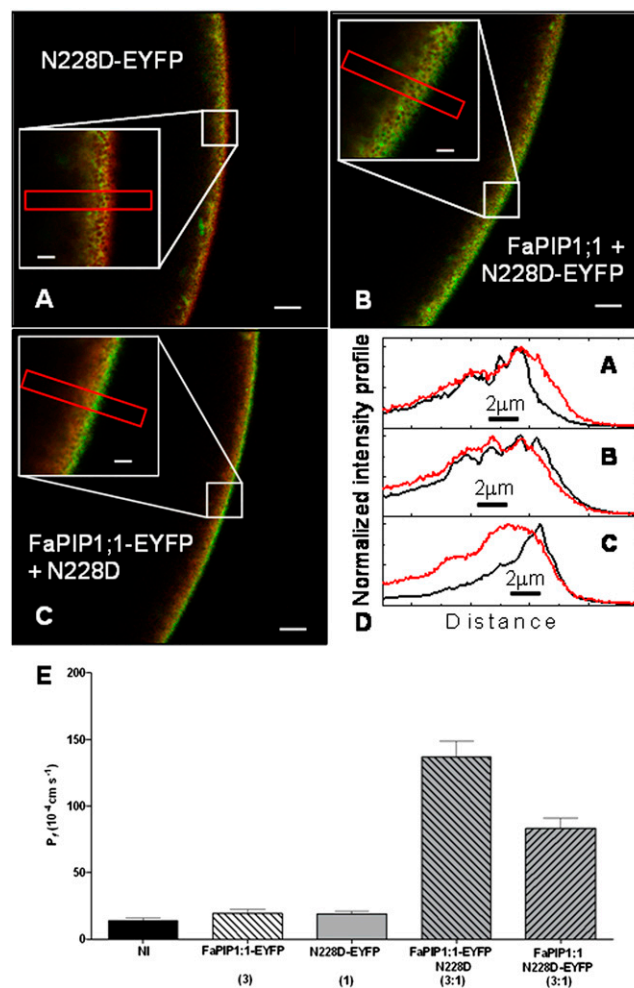

**Fig. S3.** Subcellular localization of FaPIP2;1N228D-EYFP and FaPIP1;1-EYFP. (A–C) Radial ( $x-z$ ) confocal images of *Xenopus* oocytes expressing FaPIP2;1N228D-EYFP (A and B) (green) and FaPIP1;1-EYFP (C) (green), previously injected with tetramethylrhodamine (TMR)-Dextran (red). (A) FaPIP2;1N228D-EYFP expressed individually is restricted to internal structures; (B) when FaPIP2;1N228D-EYFP is coexpressed with FaPIP1;1, the fluorescence is mainly visualized at the limit of the cell, indicating the relocation of FaPIP2;1N228D-EYFP to the plasma membrane. (C) FaPIP1;1-EYFP coexpressed with FaPIP2;1N228D undergoes the same relocation to PM. (D) Normalized intensity profile of the selected areas in A, B, and C. The black line represents EYFP intensity levels and the red line shows the TMR-Dextran. (E) Osmotic water permeability of FaPIP2;1N228D-EYFP and FaPIP1;1-EYFP in *Xenopus* oocytes. Shown is a representative experiment from at least three independent experiments. The amount of aquaporin cRNA is represented in parentheses with an arbitrary unit of measure where 1 is equivalent to 1.25 ng of cRNA. In the case of EYFP-tagged aquaporins, 1 is equivalent to 2.50 ng of cRNA. Data are expressed as mean values (mean  $P_f \pm$  SEM,  $n = 8-12$ ).
